# Supplementary material for: Developmental Accumulation of Gene Body and Transposon Non-CpG Methylation in the Zebrafish Brain
Source: Front Cell Dev Biol. 2021 Mar 4;9:643603. doi: 10.3389/fcell.2021.643603 (PMC7978034; doi:10.3389/fcell.2021.643603)
Supplement: Supplementary file 1 [file Table_1.xlsx]

## Sheet: Supplementary_Table 1
Supplementary Table 1: DNA oligos for gRNA synthesis, amplicon sequencing and qpCR
Oligo name	Sequence
Universal oligo	AAAAGCACCGACTCGGTGCCACTTTTTCAAGTTGATAACGGACTAGCCTTATTTTAACTTGCTATTTCTAGCTCTAAAAC
dnmt3aa gRNA 1	taatacgactcactataGGGCCGCCTCCCGTCGCCTGgttttagagctagaa
dnmt3aa gRNA 2	taatacgactcactataGGTGTGCTGTTGCTGAGGTAgttttagagctagaa
dnmt3aa amplicon F	TCACCTGGTACTCTTGGTGT
dnmt3aa amplicon R	CAATCAGCAGTGGGCTCTCA
dnmt3ab gRNA 1	taatacgactcactataGGCAGCCGAAGGCACCAGATgttttagagctagaa
dnmt3ab gRNA 2	taatacgactcactataGGGCCGGGTCGTATCCTGGgttttagagctagaa
dnmt3ab amplicon F	GCAAGAGTGAATAGAAACTCACCAC
dnmt3ab amplicon R	ATGGCCGAGGTTTTGGCATT
bactin qPCR F	CGAGCAGGAGATGGGAACC
bactin qPCR R	CAACGGAAACGCTCATTGC
dnmt3aa qpcr F	ATCGGCCACTGACTGCTATG
dnmt3aa qpcr R	GGAAAGCCGAAAACTCTCTCC
dnmt3ab qpcr F	AAGAAAAGGTCTCTACGAGGGC
dnmt3ab qpcr R	CCCCCAAAAATAGCGTGCTC

## Sheet: Supplementary Table 2
Supplementary Table 2: WGBS, RRBS and RNA-seq library statistics
Sample	read length (bp)	read pairs	uniquely mapped read pairs	% genome covered (including alternate contigs)	average depth of covered regions	non conversion rate
WT_brain_rep1	150; PE	88403850	42644685	86.8582	4.3	0.0005
WT_brain_rep2	150; PE	103874433	50705898	91.8438	4.9	0.0005
dnmt3ba_cKO_rep1	150; PE	117978540	58449082	93.8115	5.3	0.0005
dnmt3ba_cKO_rep2	150; PE	90857964	42642183	85.7323	3.9	0.0004
1wk_RRBS_rep1	150; PE	43963457	24247722	25.7853	5.1	0.0005
1wk_RRBS_rep2	150; PE	64902539	35952590	28.0575	6.6	0.0005
2wk_RRBS_rep1	150; PE	37710478	21252587	26.5347	4.4	0.0005
2wk_RRBS_rep2	150; PE	54472119	30758800	28.9194	5.8	0.0005
3wk_RRBS_rep1	150; PE	54418502	31101272	32.1087	5.3	0.0005
3wk_RRBS_rep2	150; PE	59950131	34138471	30.1072	6.1	0.0004
4wk_RRBS_rep1	150; PE	34138471	9799303	25.2092	5.4	0.0005
4wk_RRBS_rep2	150; PE	33171233	18198715	20.3907	5	0.0004
5wk_RRBS_rep1	150; PE	64023847	35621232	32.8092	6	0.0005
5wk_RRBS_rep2	150; PE	47214461	26201377	26.4242	5.5	0.0004
6wk_RRBS_rep1	150; PE	52825626	29300485	33.477	4.9	0.0003
6wk_RRBS_rep2	150; PE	38391292	21319210	24.0014	5	0.0004
adult_RRBS_rep1	150; PE	34846053	20221117	19.7657	5.7	0.0005
adult_RRBS_rep2	150; PE	35645428	7919929	23.4305	4.8	0.0004
3wk_RNA_rep1	150; PE	73298091	55567950	NA	NA	NA
3wk_RNA_rep2	150; PE	64412462	49087355	NA	NA	NA
4wk_RNA_rep1	150; PE	52514603	36533297	NA	NA	NA
4wk_RNA_rep2	150; PE	54154024	34678955	NA	NA	NA
6wk_RNA_rep1	150; PE	55264418	45092888	NA	NA	NA
6wk_RNA_rep2	150; PE	32981578	27233634	NA	NA	NA
adult_RNA_rep1	150; PE	35106582	28854597	NA	NA	NA
adult_RNA_rep2	150; PE	44660528	36443808	NA	NA	NA
